# Supplementary material for: Pressure-Induced Neutral to Ionic Phase Transition in TTF-Fluoranil, DimethylTTF-Fluoranil and DimethylTTF-Chloranil: A Comparative THz Raman Study
Source: MDPI journal article supplement (doi:10.3390/cryst13101428), 2023-09-26
Supplement: s1 [file s1]

Archive with 1 entries (1 files):
- crystals-2626980-supplementary.pdf
